# Supplementary material
Source: PubMed Central journal article supplement (PMC6842439)
Supplement: NIHMS1538603-supplement-2.pdf [file NIHMS1538603-supplement-2.pdf]

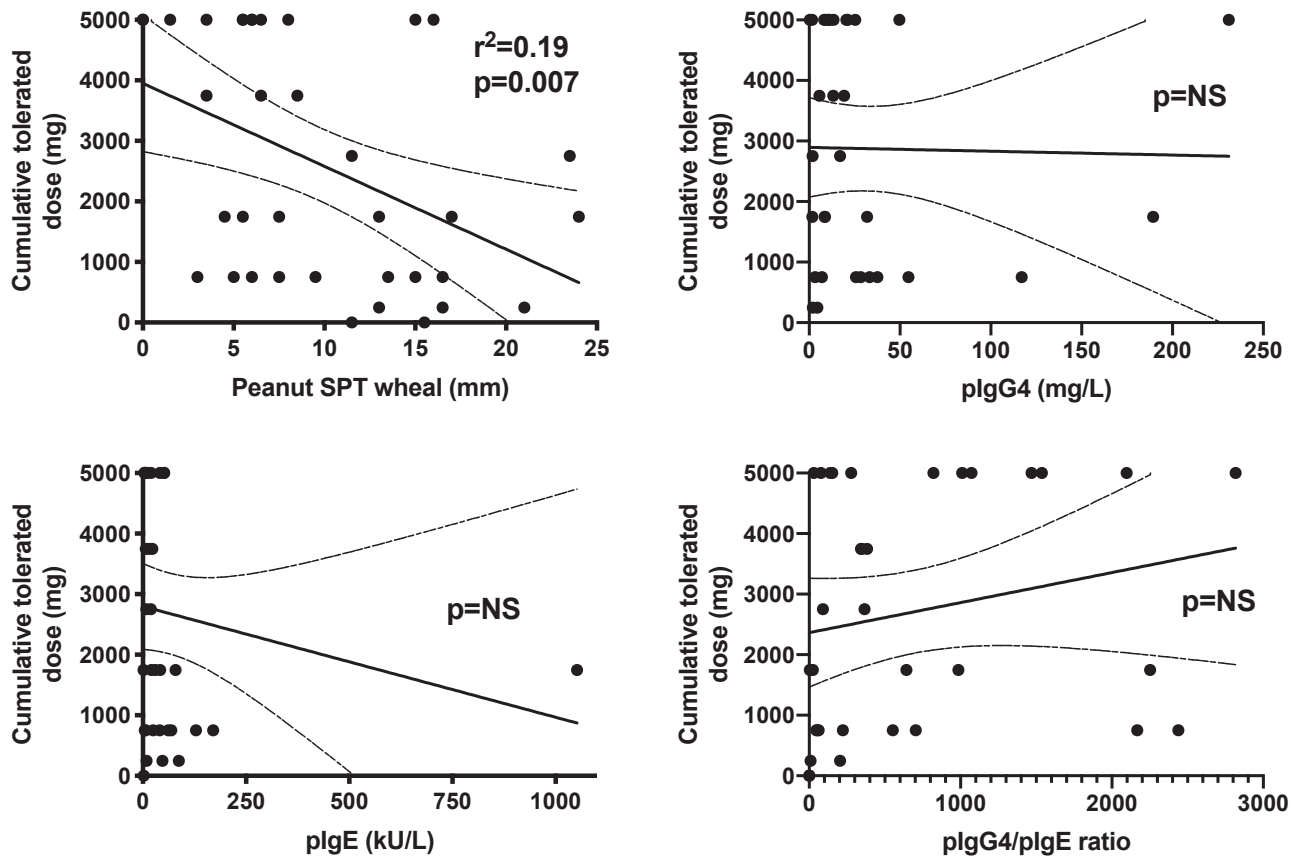

**FIG E1.** Correlation of DBPCFC results with peanut-specific immunoglobulin levels and SPT responses. Posttherapy DBPCFC outcomes correlated against pn-sIgE levels, pn-sIgG<sub>4</sub> levels, pn-sIgG<sub>4</sub>/pn-sIgE ratios, and SPT responses. There were significant negative associations with peanut SPT responses ( $r^2 = 0.19$ ,  $P = .007$ ). NS, Not significant.
